# Supplementary material
Source: PubMed Central journal article supplement (PMC6437486)
Supplement: AAC.02176-18-s0001.pdf [file AAC.02176-18-s0001.pdf]

**Novel Polymyxin Combination with Antiretroviral Zidovudine Exerts Synergistic Killing  
against NDM-producing MDR *Klebsiella pneumoniae***

Yu-Wei Lin<sup>1</sup>, Nusaibah Abdul Rahim<sup>2</sup>, Jinxin Zhao<sup>1</sup>, Mei-Ling Han<sup>1</sup>, Heidi H. Yu<sup>1</sup>, Hasini Wickremasinghe<sup>1</sup>, Ke Chen<sup>1</sup>, Jiping Wang<sup>1</sup>, David L. Paterson<sup>3</sup>, Yan Zhu<sup>1</sup>, Gauri G. Rao<sup>4</sup>, Qi Tony Zhou<sup>5</sup>, Alan Forrest<sup>4</sup>, Tony Velkov<sup>6</sup>, and Jian Li<sup>1\*</sup>

<sup>1</sup>Monash Biomedicine Discovery Institute, Infection and Immunity Program and Department of Microbiology, Monash University, Clayton, Victoria 3800, Australia.

<sup>2</sup>School of Pharmacy, Taylor's University, Subang Jaya, Selangor 47500, Malaysia.

<sup>3</sup>The University of Queensland, UQ Centre for Clinical Research, Brisbane, Queensland 4072, Australia.

<sup>4</sup>Division of Pharmacotherapy and Experimental Therapeutics, Eshelman School of Pharmacy, The University of North Carolina, Chapel Hill, NC 27599, USA.

<sup>5</sup>Department of Industrial and Physical Pharmacy, College of Pharmacy, Purdue University, West Lafayette, Indiana 47907, USA.

<sup>6</sup>Department of Pharmacology and Therapeutics, The University of Melbourne, Melbourne, Victoria 3800, Australia.

\*Corresponding author: Jian Li, telephone: +61 3 9903 9702, fax: +61 3 9905 6450, Email: [jian.li@monash.edu](mailto:jian.li@monash.edu).

**Figure S1.** Observed bacterial counts *versus* individual (**upper panel**) and population (**lower panel**) fitted bacterial counts for polymyxin B and zidovudine alone or in combination against NDM-producing *Klebsiella pneumoniae* isolates. The solid red lines represent the line of identity. The values below the limit of detection are plotted as zero.

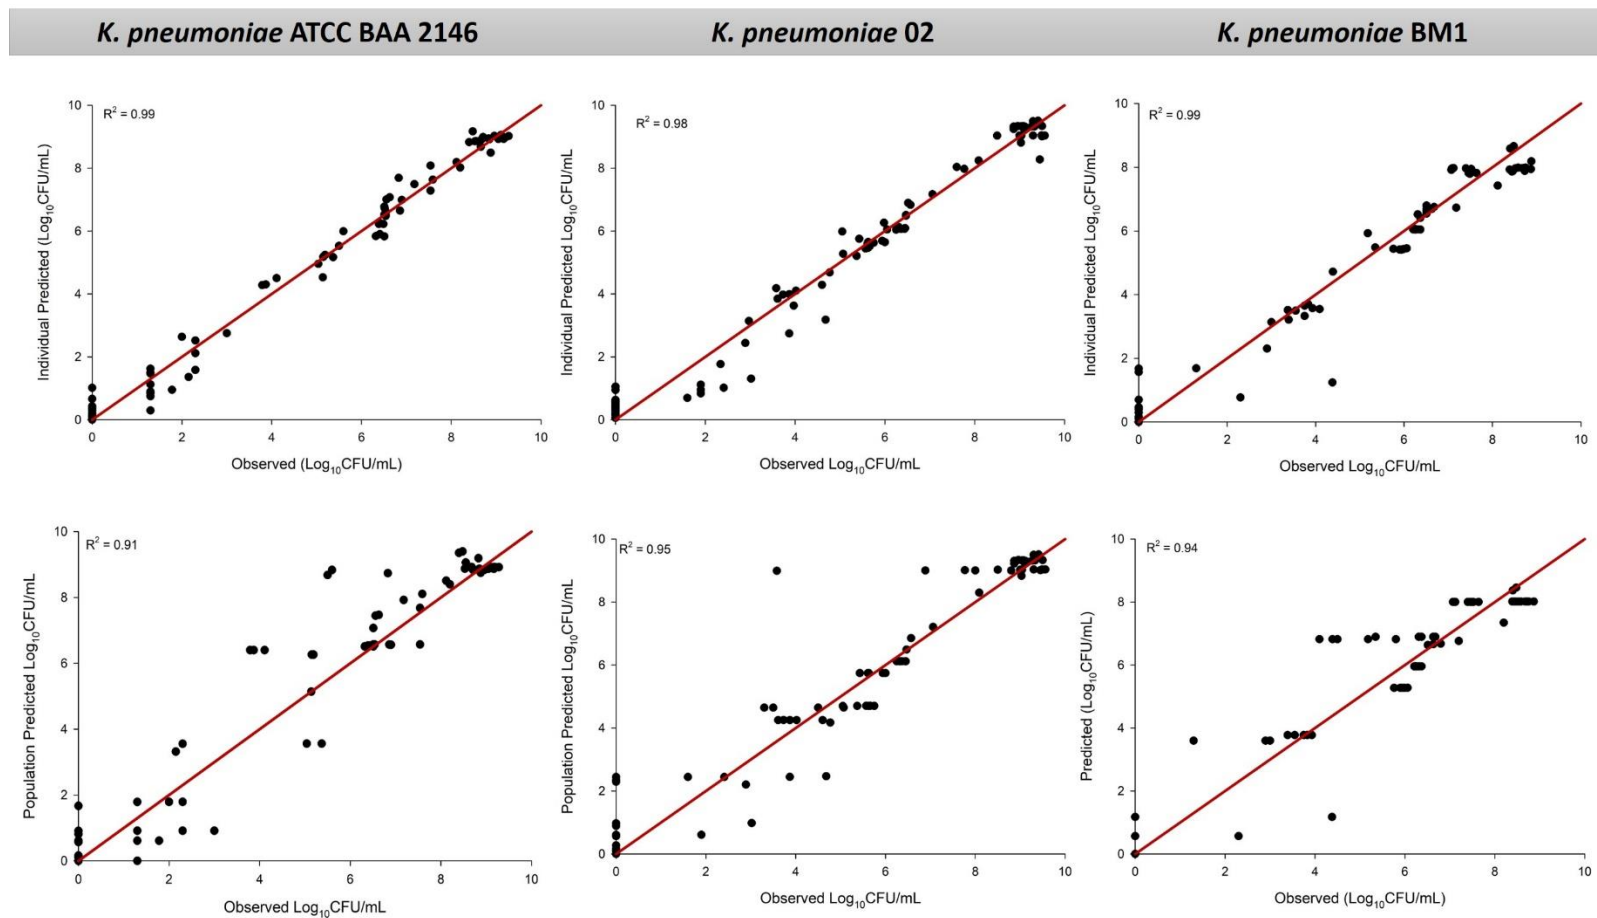







**Table S1.** Population mean parameter estimates for the synergic combination of polymyxin B and zidovudine against three NDM-producing *K. pneumoniae* strains. Values in parentheses are standard errors.

| Parameter                                                           | Symbol                                   | Unit   | Population mean (SE [%]) for each strain and treatment |                         |                          |
|---------------------------------------------------------------------|------------------------------------------|--------|--------------------------------------------------------|-------------------------|--------------------------|
|                                                                     |                                          |        | <i>K. pneumoniae</i> ATCC<br>BAA 2146                  | <i>K. pneumoniae</i> 02 | <i>K. pneumoniae</i> BM1 |
| Initial inoculum for total bacterial population                     | $\text{Log}_{10}\text{CFU}_0$            | CFU/mL | 6.57 (1.01%)                                           | 6.49 (0.735%)           | 6.64 (1.12%)             |
| Maximum population size                                             | $\text{Log}_{10}\text{CFU}_{\text{max}}$ | CFU/mL | 8.92 (0.998%)                                          | 9.03 (0.356%)           | 8.02 (1.97%)             |
| Mutation frequency                                                  |                                          |        |                                                        |                         |                          |
| Subpopulation 2                                                     | $\text{Log}_{10}(\text{MUT},\text{S}2)$  | CFU/mL | -4.99 (2.56%)                                          | -6.26 (1.29%)           | -6.53 (5.49%)            |
| Subpopulation 3                                                     | $\text{Log}_{10}(\text{MUT},\text{S}3)$  | CFU/mL | -6.55 (1.61%)                                          | -8.62 (1.77%)           | -6.68 (0.775%)           |
| First order bacterial death rate constant                           | $K_d$                                    | 1/h    | 0.224 (fixed)                                          | 0.434 (fixed)           | 0.209 (fixed)            |
| Bacterial density at which $\text{VG}_{\text{max}}$ is half-maximal |                                          |        |                                                        |                         |                          |
| Subpopulation 1                                                     | $\text{Log}_{10}\text{CFU}_m$            | CFU/mL | 7.5 (1.3%)                                             | 8.44 (0.515%)           | 8.32 (1.53%)             |

|                                                                    |                                     |        |               |               |               |
|--------------------------------------------------------------------|-------------------------------------|--------|---------------|---------------|---------------|
| Subpopulations 2 & 3                                               | $\text{Log}_{10}\text{CFU}_m$       | CFU/mL | 8.14 (1.2%)   | 8.44 (0.515%) | 6.89 (2.53%)  |
| Maximum fold-enhancement of $K_d$ due to polymyxin B               | $K_{\max,\text{PMB}}$               | 1/h    | 145 (4.57%)   | 1320 (4.92%)  | 602 (7.23%)   |
| Polymyxin concentration resulting in 50% of $K_{\max,\text{PMB}}$  |                                     |        |               |               |               |
| Susceptible                                                        |                                     | mg/L   | 0.178 (35.8%) | 0.345 (10.6%) | 0.144 (10.6%) |
| Intermediate                                                       | $K_{C_{50},\text{PMB}}$             |        | -             | 21.7 (4.98%)  | -             |
| Resistant                                                          |                                     | mg/L   | 23.6 (7.9%)   | 180 (10.2%)   | 137 (5.16%)   |
| Maximum fold-reduction of $\text{VG}_{\max}$ due to Zidovudine     | $K_{\max,\text{ZID}}$               | 1/h    | 0.983 (5.37%) | 1.6 (7.86%)   | 10.3 (4.52%)  |
| Zidovudine concentration resulting in 50% of $K_{\max,\text{ZID}}$ |                                     |        |               |               |               |
| Susceptible                                                        |                                     | mg/L   | 0.999 (9.39%) | 0.314 (15.6%) | 0.355 (30.3%) |
| Intermediate                                                       | $K_{C_{50},\text{ZID}}$             | mg/L   | -             | 3.48 (7.67%)  | -             |
| Resistant                                                          |                                     | mg/L   | 754 (10.1%)   | 251 (5.58%)   | 155 (13.3%)   |
| Hill coefficient for polymyxin effect                              | $\text{Log}_{10}(\text{Hill, PMB})$ | -      | 0.733 (10.5%) | 0.522 (5.81%) | 0.835 (15.8%) |

|                                                                                     |                               |      |              |               |               |
|-------------------------------------------------------------------------------------|-------------------------------|------|--------------|---------------|---------------|
| Hill coefficient for zidovudine effect                                              | Log <sub>10</sub> (Hill, ZID) | -    | 0.729 (17%)  | 0.793 (20.2%) | 0.785 (14.9%) |
| Polymyxin B concentration resulting in<br>50% of IMAX <sub>ii</sub>                 | IC <sub>50,SYN,PMB</sub>      | mg/L | 10.8 (6.42%) | 0.502 (18.7%) | 0.471 (16.5%) |
| Maximum fractional decrease of<br>IC <sub>50,Synergy,Polymyxin</sub> by polymyxin B | IMAX <sub>ii</sub>            | 1/h  | 7.72 (1.48%) | 5.86 (1.98%)  | 1.97 (4.24%)  |

---

The between-curve variability was set to a coefficient of variation of 15% for all parameters.
